# Supplementary material
Source: publisher figshare collection journal article supplement (https://tandf.figshare.com/articles/dataset/_/5831376)
Supplement: Supplementary file 1 [file 1]

Supporting Information of

**Photo-stability study of a solution-processed small molecule solar cell system: correlation between molecular conformation and degradation**

Michael J. Newman<sup>a</sup>, Emily M. Speller<sup>a</sup>, Jérémy Barbé<sup>a</sup>, Joel Luke<sup>b</sup>, Meng Li<sup>c</sup>, Zhe Li<sup>a</sup>, Zhao-Kui Wang<sup>c</sup>, Sagar M. Jain<sup>a</sup>, Ji-Seon Kim<sup>b</sup>, Harrison Ka Hin Lee<sup>a</sup>, Wing Chung Tsoi<sup>a</sup>

<sup>a</sup>*SPECIFIC, Department of Engineering, Swansea University, Swansea, UK*

<sup>b</sup>*Department of Physics and Centre for Plastic Electronics, Imperial College London, London SW7 2AZ, UK*

<sup>c</sup>*Institute of Functional Nano & Soft Materials (FUNSOM), Soochow University, 215123, China*

Corresponding authors: Dr Harrison Ka Hin Lee and Dr Wing Chung Tsoi

Address: SPECIFIC, College of Engineering, Swansea University, Bay Campus, Fabian Way, Swansea SA1 8EN, United Kingdom

Emails: [K.H.Lee@Swansea.ac.uk](mailto:K.H.Lee@Swansea.ac.uk) and [W.C.Tsoi@Swansea.ac.uk](mailto:W.C.Tsoi@Swansea.ac.uk).

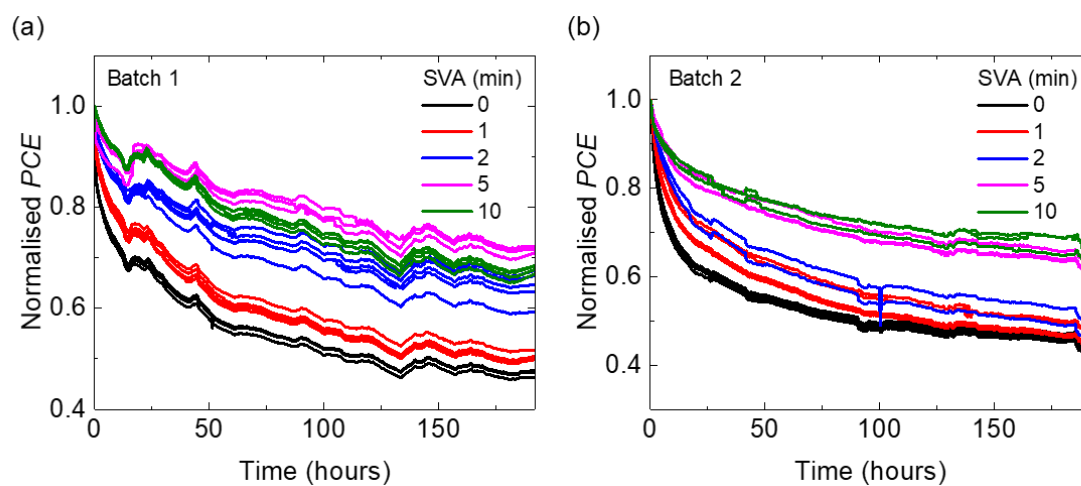

Fig. S1 Normalised *PCE* of devices in (a) batch 1 and (b) batch 2. Lines in the same colour are different cells within a sample.

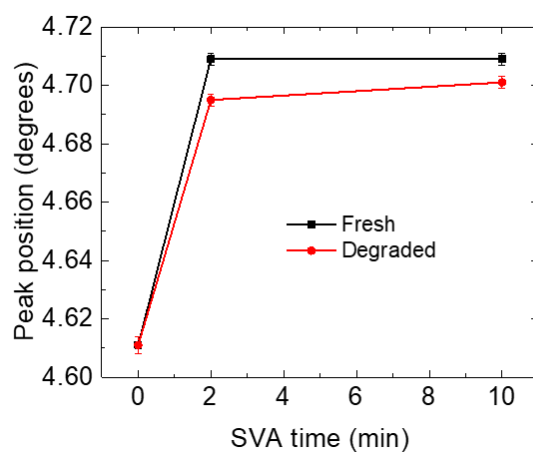

Fig. S2 GI-XRD peak positions of the BTR:PC<sub>71</sub>BM films with different SVA treatment times.

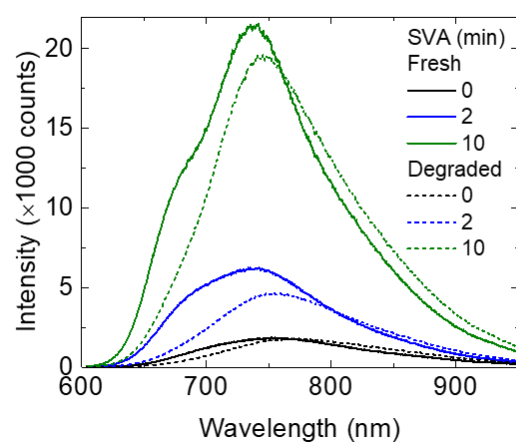

Fig. S3 PL spectra of BTR:PC<sub>71</sub>BM films with increasing SVA time, before and after photo-aging.
