# Supplementary material
Source: publisher figshare collection journal article supplement (https://tandf.figshare.com/articles/dataset/_/5831376)
Supplement: Supplementary file 2 [file 1]

Archive with 2 entries (2 files):
- BTR stability SI_HL_Final.DOCX
- suppl.pdf
