# Supplementary material
Source: publisher figshare collection journal article supplement (https://tandf.figshare.com/articles/dataset/_/5831376)
Supplement: Supplementary file 2 [file 1 › BTR stability SI_HL_Final.DOCX]

Supporting Information of

**Photo-stability study of a solution-processed small molecule solar cell system: correlation between molecular conformation and degradation**

Michael J. Newmana, Emily M. Spellera, Jérémy Barbéa, Joel Lukeb, Meng Lic, Zhe Lia, Zhao-Kui Wangc, Sagar M. Jaina, Ji-Seon Kimb, Harrison Ka Hin Leea, Wing Chung Tsoia

aSPECIFIC, Department of Engineering, Swansea University, Swansea, UK

bDepartment of Physics and Centre for Plastic Electronics, Imperial College London, London SW7 2AZ, UK

cInstitute of Functional Nano & Soft Materials (FUNSOM), Soochow University, 215123, China

Corresponding authors: Dr Harrison Ka Hin Lee and Dr Wing Chung Tsoi

Address: SPECIFIC, College of Engineering, Swansea University, Bay Campus, Fabian Way, Swansea SA1 8EN, United Kingdom

Emails: [K.H.Lee@Swansea.ac.uk](mailto:K.H.Lee@Swansea.ac.uk) and [W.C.Tsoi@Swansea.ac.uk](mailto:W.C.Tsoi@Swansea.ac.uk).


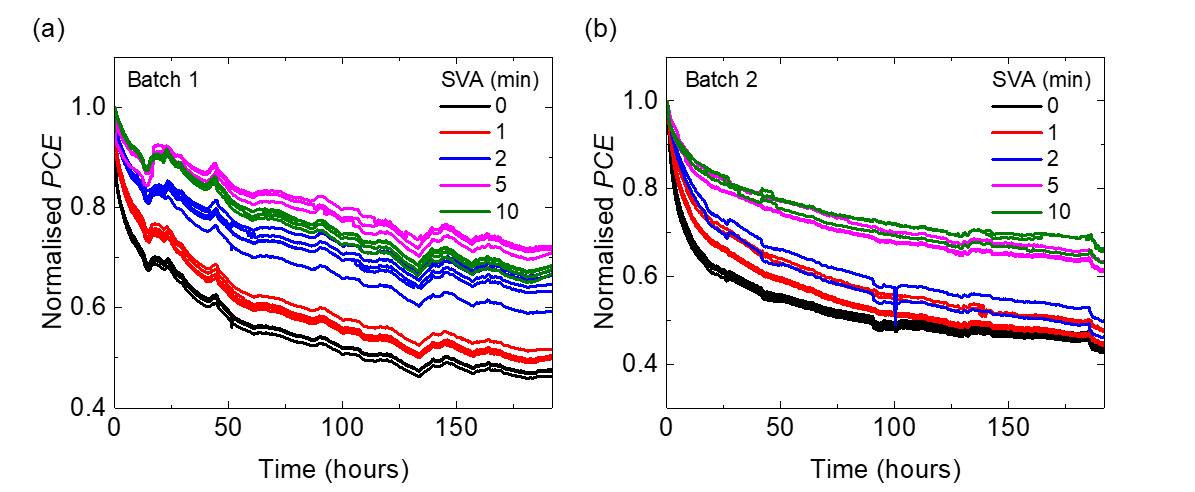


Fig. S1 Normalised *PCE* of devices in (a) batch 1 and (b) batch 2. Lines in the same colour are different cells within a sample.


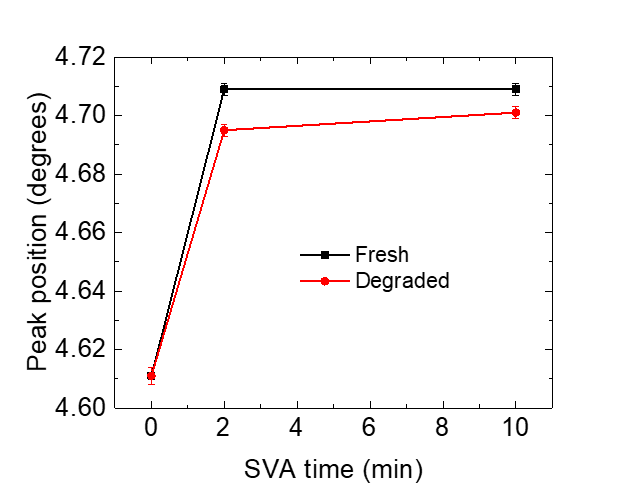


Fig. S2 GI-XRD peak positions of the BTR:PC71BM films with different SVA treatment times.


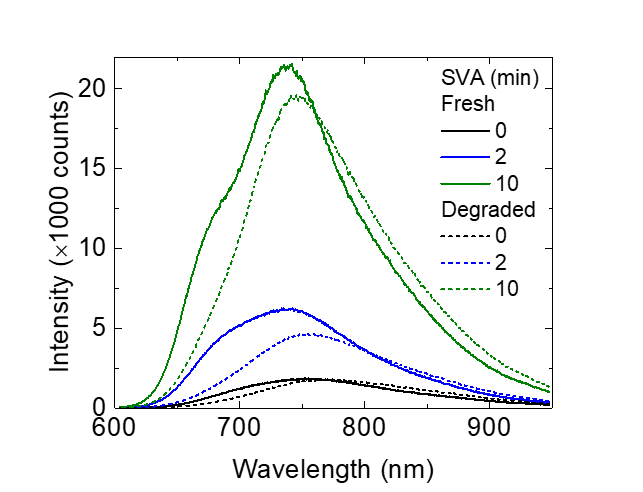


Fig. S3 PL spectra of BTR:PC71BM films with increasing SVA time, before and after photo-aging.
